# Supplementary material for: RhVI1 is a membrane-anchored vacuolar invertase highly expressed in Rosa hybrida L. petals
Source: PubMed Central journal article supplement (PMC4892724; doi:10.1093/jxb/erw148), 2016-04-15
Supplement: supp_erw148_supplementary_figure_S1_tables_S1_S2.pdf [file supp_erw148_supplementary_figure_S1_tables_S1_S2.pdf]

## Supplemental Files

**Supplementary figure 1:** SDS-PAGE on the SEC fractions stained by Coomassie (a), silvering (b) and the glycoproteins staining assay (c). In the lanes 1, 2, 3 and 4 are loaded 0.4, 0.3, 0.2, 0.1 µg of RhVII, respectively. The asterisks (\*) show the migration level of the RhVII band. M is indicating the lane with the molecular marker.

## Supplementary table 1:

Main regions and domains of the RhVII and their related functions.

## Supplementary table 2:

Comparison between the homologues of *RHVII* and *2* with two other dicotyledons species from the same family (*Rosaceae*) and also with the monocotyledon *Zea mais* L. (*Graminaceae*). The level of homology and the difference in pI values between the two isoforms are conserved suggesting a basic mechanism related to their function.

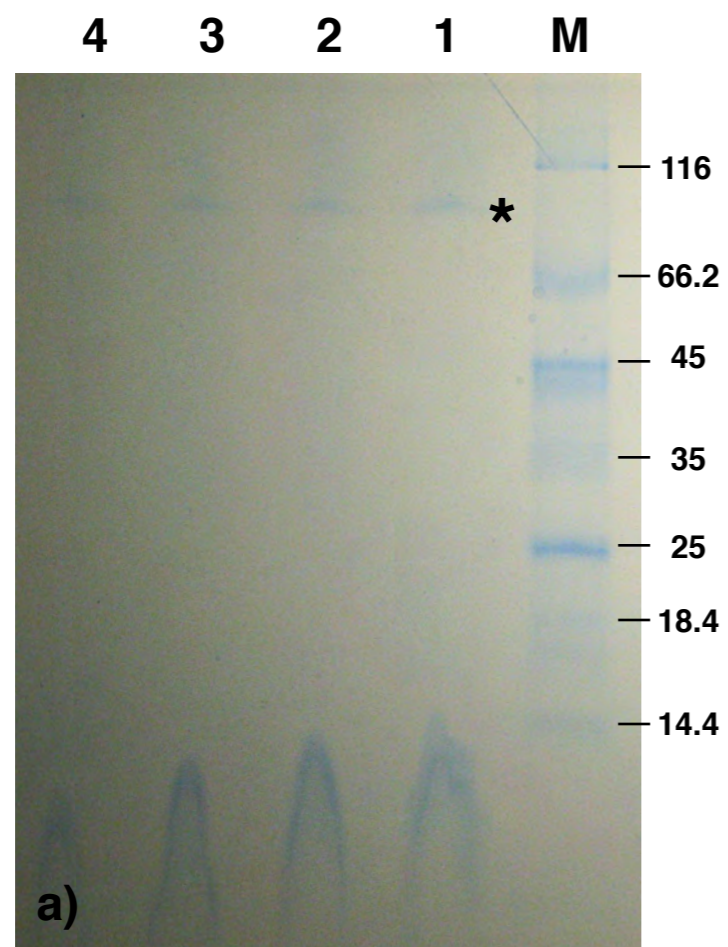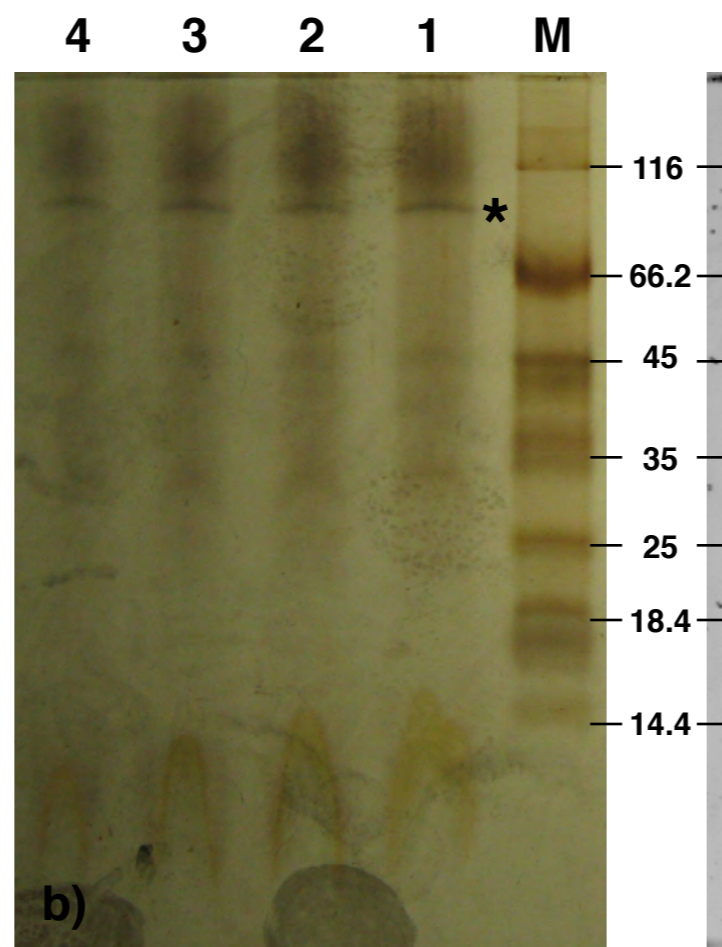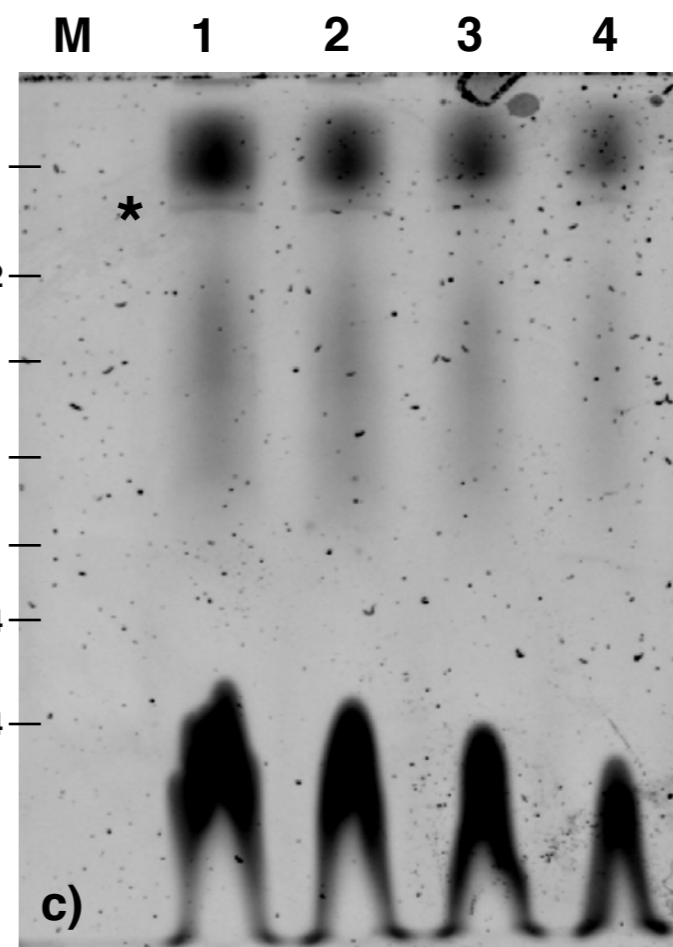

| Domain Name                             | Amino Acid Residues | Function                                                                                         | Software           |
|-----------------------------------------|---------------------|--------------------------------------------------------------------------------------------------|--------------------|
| Beta-fructofuranoside                   | 7-115               | hydrolyses the terminal non-reducing beta-D-fructofuranoside residues                            | InterPro EMBL-EBI  |
| Transmembrane                           | 33-56 , 156-182     | anchors the protein to the vacuole membrane                                                      | InterPro EMBL-EBI  |
| O-Glycosylation                         | 74-103              | involved in protein stability and folding                                                        | NetOGlyc 4.0 - CBS |
| N-Glycosylation                         | 160-450             | involved in protein stability and solubility                                                     | NetNGlyc 1.0 - CBS |
| Glycoside hydrolase active site         | 123-136             | contains an aspartic acid residues important for the catalytic mechanism                         | InterPro EMBL-EBI  |
| Glycosyl hydrolase family 32 N-terminal | 123-441             | catalytic region, forms a five bladed beta propeller structure                                   | InterPro EMBL-EBI  |
| Glycosyl hydrolase family 32 C-terminal | 409-459 , 492-579   | a role in preserving stability at high temperature is hypothesized, forms a beta sandwich module | InterPro EMBL-EBI  |

| Specie                    | Gene name                    | Transmembrane domain | Theoretical pI | Homology                  | Site of vacuolar membrane localization |
|---------------------------|------------------------------|----------------------|----------------|---------------------------|----------------------------------------|
| <b>Rosa hybrida L.</b>    | RhIV1 (H2DF87)               | TM 32-1              | pI 4.78        | -                         | Cytoplasmic                            |
|                           | RhIV2 (H2DF88)               | TM 30-49 / 617-639   | pI 6.29        | -                         | Vacuolar                               |
| <b>Pyrus pyrifolia L.</b> | PpSAIV1 (A0A7Y9)             | TM 32-51             | pI 4.98        | Homology with RhIV1 - 75% | Cytoplasmic                            |
|                           | PpSAIV2 (A0A7Z0)             | TM 39-59 / 661-680   | pI 5.87        | Homology with RhIV2 - 75% | Vacuolar                               |
| <b>Prunus persica L.</b>  | PRUPE1 (M5XEX0)              | TM 30-49             | pI 4.75        | Homology with RhIV1 - 74% | Cytoplasmic                            |
|                           | PRUPE2 (M5WQD6)              | TM 666-685           | pI 6.45        | Homology with RhIV2 - 78% | Vacuolar                               |
| <b>Zea mays L.</b>        | IVR1 (P49175)                | TM 44-66             | pI 5.06        | Homology with RhIV1 - 55% | Cytoplasmic                            |
|                           | IVR2 (Q7XTK7)<br>--fragment- | n.d.                 | pI 4.88        | Homology with RhIV2 - 65% | Vacuolar                               |
